# Supplementary material for: Recent studies on the reaction of [X6O19]8− (X = Nb, Ta) polyanions under acidic conditions
Source: Royal Society of Chemistry journal article supplement (doi:10.1039/d4qi00899e), 2024-01-01
Supplement: d4qi00899e1.pdf [file d4qi00899e1.pdf]

## Supplementary Information

### Recent Studies on the Reaction of $[X_6O_{19}]^{8-}$ (X=Nb, Ta) Polyanions under Acidic Conditions

Haiying Wang,<sup>‡a</sup> Zhijie Liang,<sup>‡b</sup> Dongdi Zhang,<sup>\*a</sup> Jingyang Niu<sup>\*a</sup>

<sup>a</sup>Henan Key Laboratory of Polyoxometalate Chemistry, College of Chemistry and Molecular Sciences, Henan University, Kaifeng 475004, China

<sup>b</sup>School of Textiles and Clothing, Nantong University, Nantong 226019, China.

Table S1. A summary of PONbs and POTas synthesized under acid conditions.

| Molecular formula                                                                                                      | Corresponding author | Article                                 | Year |
|------------------------------------------------------------------------------------------------------------------------|----------------------|-----------------------------------------|------|
| <b>Lindqvist-type Mixed-PONb clusters</b>                                                                              |                      |                                         |      |
| Cs <sub>4</sub> Na[Ta <sub>3</sub> W <sub>3</sub> O <sub>19</sub> ]·6H <sub>2</sub> O                                  | M. Nyman             | <i>Dalton Trans.</i> , 2015, 44, 15813. | 2015 |
| Cs <sub>5</sub> [NbW <sub>9</sub> O <sub>32</sub> ]·7.5H <sub>2</sub> O                                                | M. Nyman             | <i>Dalton Trans.</i> , 2015, 44, 15813. | 2015 |
| Cs <sub>5</sub> [TaW <sub>9</sub> O <sub>32</sub> ]·6.5H <sub>2</sub> O                                                | M. Nyman             | <i>Dalton Trans.</i> , 2015, 44, 15813. | 2015 |
| Cs <sub>6</sub> [Ta <sub>2</sub> W <sub>8</sub> O <sub>32</sub> ]·6H <sub>2</sub> O                                    | M. Nyman             | <i>Dalton Trans.</i> , 2015, 44, 15813. | 2015 |
| <b>Keggin-type Mixed-PONb clusters</b>                                                                                 |                      |                                         |      |
| [(CH <sub>3</sub> ) <sub>3</sub> NH] <sub>7</sub> [Si(NbO <sub>2</sub> ) <sub>3</sub> W <sub>9</sub> O <sub>37</sub> ] | Craig L. Hill        | <i>J. Med. Chem.</i> , 1994, 37, 816.   | 1994 |
| Cs <sub>7</sub> [Si(NbO <sub>2</sub> ) <sub>3</sub> W <sub>9</sub> O <sub>37</sub> ]                                   | Craig L. Hill        | <i>J. Med. Chem.</i> , 1994, 37, 816.   | 1994 |
| α-K <sub>5</sub> [Si(NbO <sub>2</sub> )W <sub>11</sub> O <sub>39</sub> ]                                               | Craig L. Hill        | <i>J. Med. Chem.</i> , 1994, 37, 816.   | 1994 |
| α-[(CH <sub>3</sub> ) <sub>3</sub> NH] <sub>5</sub> [Si(NbO <sub>2</sub> )W <sub>11</sub> O <sub>37</sub> ]            | Craig L. Hill        | <i>J. Med. Chem.</i> , 1994, 37, 816.   | 1994 |
| ( <i>n</i> -Bu <sub>4</sub> N) <sub>4</sub> [PNbW <sub>11</sub> O <sub>40</sub> ]                                      | ROBERT H. BEER       | <i>Polyhedron</i> , 1995, 14, 2139.     | 1995 |
| ( <i>n</i> -Bu <sub>4</sub> N) <sub>4</sub> [PTaW <sub>11</sub> O <sub>40</sub> ]                                      | ROBERT H. BEER       | <i>Polyhedron</i> , 1995, 14, 2139.     | 1995 |
| (TBA) <sub>4</sub> H <sub>2</sub> [(NbO <sub>2</sub> ) <sub>3</sub> PW <sub>9</sub> O <sub>37</sub> ]                  | Craig L. Hill        | <i>Inorg. Chem.</i> , 1998, 37, 5550.   | 1998 |

|                                                                                                                                                                                                                     |                                       |                                                  |      |
|---------------------------------------------------------------------------------------------------------------------------------------------------------------------------------------------------------------------|---------------------------------------|--------------------------------------------------|------|
| (TBA) <sub>4</sub> H <sub>2</sub> [Nb <sub>3</sub> PW <sub>9</sub> O <sub>40</sub> ]                                                                                                                                | Craig L. Hill                         | <i>Inorg. Chem.</i> , 1998, 37, 5550.            | 1998 |
| (TBA <sub>3</sub> )H <sub>3</sub> [Nb <sub>6</sub> P <sub>2</sub> W <sub>18</sub> O <sub>77</sub> ]                                                                                                                 | Craig L. Hill                         | <i>Inorg. Chem.</i> , 1998, 37, 5550.            | 1998 |
| Cs <sub>20</sub> [Nb <sub>4</sub> O <sub>6</sub> (α-Nb <sub>3</sub> SiW <sub>9</sub> O <sub>40</sub> ) <sub>4</sub> ]                                                                                               | Craig L. Hill                         | <i>Angew. Chem.</i> , 1999, 38, 3205.            | 1999 |
| A-α-[Si <sub>2</sub> Nb <sub>6</sub> W <sub>18</sub> O <sub>77</sub> ] <sup>8-</sup>                                                                                                                                | Craig L. Hill                         | <i>Chem. Commun.</i> , 1999, 1651.               | 1999 |
| A-α-Cs <sub>6</sub> H[Si(NbO <sub>2</sub> ) <sub>3</sub> W <sub>9</sub> O <sub>37</sub> ]·9H <sub>2</sub> O                                                                                                         | Gyu-Shik Kim                          | <i>Bull. Korean Chem. Soc.</i> , 2003, 24, 1005. | 2003 |
| Cs <sub>6.5</sub> K <sub>0.5</sub> [GeW <sub>9</sub> (NbO <sub>2</sub> ) <sub>3</sub> O <sub>37</sub> ]·6H <sub>2</sub> O                                                                                           | Lin Xu, Shu-Xia Liu                   | <i>Chem. Eur. J.</i> , 2010, 16, 13435.          | 2010 |
| Cs <sub>6.5</sub> K <sub>0.5</sub> [GeW <sub>9</sub> Nb <sub>3</sub> O <sub>40</sub> ]·10H <sub>2</sub> O                                                                                                           | Lin Xu, Shu-Xia Liu                   | <i>Chem. Eur. J.</i> , 2010, 16, 13435.          | 2010 |
| Cs <sub>5</sub> [H <sub>15</sub> Ge <sub>2</sub> W <sub>18</sub> Nb <sub>8</sub> O <sub>88</sub> ]·18H <sub>2</sub> O                                                                                               | Lin Xu, Shu-Xia Liu                   | <i>Chem. Eur. J.</i> , 2010, 16, 13435.          | 2010 |
| Cs <sub>8</sub> K <sub>3</sub> H <sub>9</sub> [Ge <sub>4</sub> W <sub>36</sub> Nb <sub>16</sub> O <sub>166</sub> ]·27H <sub>2</sub> O                                                                               | Lin Xu, Shu-Xia Liu                   | <i>Chem. Eur. J.</i> , 2010, 16, 13435.          | 2010 |
| Cs <sub>3</sub> K <sub>4</sub> [(Ge <sub>2</sub> W <sub>18</sub> Nb <sub>6</sub> O <sub>78</sub> )Eu(H <sub>2</sub> O) <sub>4</sub> ]·23H <sub>2</sub> O                                                            | Shu-Xia Liu                           | <i>CrystEngComm.</i> , 2012, 14, 1397.           | 2012 |
| Cs <sub>8</sub> K <sub>9</sub> [(Ge <sub>4</sub> W <sub>36</sub> Nb <sub>12</sub> O <sub>156</sub> )Eu(H <sub>2</sub> O) <sub>3</sub> ]·25H <sub>2</sub> O                                                          | Shu-Xia Liu                           | <i>CrystEngComm.</i> , 2012, 14, 1397.           | 2012 |
| Cs <sub>12</sub> K <sub>2</sub> [Cs(GeW <sub>9</sub> Nb <sub>3</sub> O <sub>40</sub> ) <sub>4</sub> (SO <sub>4</sub> )Eu <sub>5</sub> (H <sub>2</sub> O) <sub>36</sub> ]·61H <sub>2</sub> O                         | Shu-Xia Liu                           | <i>CrystEngComm.</i> , 2012, 14, 1397.           | 2012 |
| Cs <sub>12.5</sub> K <sub>1.5</sub> [Cs <sub>2</sub> (GeW <sub>9</sub> Nb <sub>3</sub> O <sub>40</sub> ) <sub>4</sub> Eu <sub>4</sub> (H <sub>2</sub> O) <sub>22</sub> ]·28H <sub>2</sub> O                         | Shu-Xia Liu                           | <i>CrystEngComm.</i> , 2012, 14, 1397.           | 2012 |
| Cs <sub>11.5</sub> [(GeW <sub>9</sub> Nb <sub>3</sub> O <sub>40</sub> ) <sub>4</sub> Eu <sub>5.5</sub> (H <sub>2</sub> O) <sub>26</sub> ]·24H <sub>2</sub> O                                                        | Shu-Xia Liu                           | <i>CrystEngComm.</i> , 2012, 14, 1397.           | 2012 |
| CsK <sub>2.25</sub> [GeW <sub>9</sub> Nb <sub>3</sub> O <sub>40</sub> Eu <sub>1.25</sub> (H <sub>2</sub> O) <sub>12</sub> ]·8H <sub>2</sub> O                                                                       | Shu-Xia Liu                           | <i>CrystEngComm.</i> , 2012, 14, 1397.           | 2012 |
| Cs <sub>5</sub> K[AsW <sub>9</sub> (NbO <sub>2</sub> ) <sub>3</sub> O <sub>37</sub> ]·7H <sub>2</sub> O                                                                                                             | Shu-Xia Liu                           | <i>Inorg. Chim. Acta.</i> , 2011, 376, 296.      | 2011 |
| Cs <sub>5.5</sub> Na <sub>0.5</sub> [AsW <sub>9</sub> Nb <sub>3</sub> O <sub>40</sub> ]·17H <sub>2</sub> O                                                                                                          | Shu-Xia Liu                           | <i>Inorg. Chim. Acta.</i> , 2011, 376, 296.      | 2011 |
| Cs <sub>10</sub> K <sub>3</sub> H <sub>3</sub> [As <sub>4</sub> W <sub>36</sub> Nb <sub>16</sub> O <sub>166</sub> ]·28H <sub>2</sub> O                                                                              | Shu-Xia Liu                           | <i>Inorg. Chim. Acta.</i> , 2011, 376, 296.      | 2011 |
| Cs <sub>5</sub> KH[(Si <sub>2</sub> W <sub>18</sub> Nb <sub>6</sub> O <sub>78</sub> )Cr(H <sub>2</sub> O) <sub>4</sub> ]·11H <sub>2</sub> O                                                                         | Xin-Long Wang, Yan Xing, Zhong-Min Su | <i>ChemPlusChem.</i> , 2013, 78, 775.            | 2013 |
| Cs <sub>4</sub> [(Si <sub>2</sub> W <sub>18</sub> Nb <sub>6</sub> O <sub>78</sub> )Cr <sub>2</sub> (H <sub>2</sub> O) <sub>8</sub> ]·14H <sub>2</sub> O                                                             | Xin-Long Wang, Yan Xing, Zhong-Min Su | <i>ChemPlusChem.</i> , 2013, 78, 775.            | 2013 |
| Cs <sub>4</sub> K <sub>4</sub> H[(Si <sub>2</sub> W <sub>18</sub> Nb <sub>6</sub> O <sub>78</sub> )FeCl <sub>2</sub> (H <sub>2</sub> O) <sub>2</sub> ]·13.5H <sub>2</sub> O                                         | Xin-Long Wang, Yan Xing, Zhong-Min Su | <i>ChemPlusChem.</i> , 2013, 78, 775.            | 2013 |
| Cs <sub>19</sub> K <sub>2</sub> [Nb <sub>4</sub> O <sub>6</sub> (SiW <sub>9</sub> Nb <sub>3</sub> O <sub>40</sub> ) <sub>4</sub> ]Cl·27H <sub>2</sub> O                                                             | Liang Zhao, Zhong-Min Su              | <i>Inorg. Chem. Commun.</i> , 2014, 44, 195.     | 2014 |
| [H <sub>3</sub> La <sub>8</sub> (H <sub>2</sub> O) <sub>32</sub> (C <sub>6</sub> H <sub>5</sub> NO <sub>2</sub> ) <sub>6</sub> ][SiW <sub>9</sub> Nb <sub>3</sub> O <sub>40</sub> ] <sub>3</sub> ·8H <sub>2</sub> O | Chao Qin, Zhong-Min Su                | <i>New J. Chem.</i> , 2017, 41, 10532.           | 2017 |
| [Cu <sup>I</sup> Cu <sup>II</sup> <sub>3</sub> (μ <sub>3</sub> -OH)(H <sub>2</sub> O) <sub>6</sub> (trz) <sub>3</sub> ] <sub>2</sub> (PW <sub>9</sub> Nb <sub>3</sub> O <sub>40</sub> )·13H <sub>2</sub> O          | Bin Yue, Heyong He                    | <i>Dalton Trans.</i> , 2018, 47, 233.            | 2018 |
| [Cu <sup>I</sup> Cu <sup>II</sup> <sub>3</sub> (μ <sub>3</sub> -OH)(H <sub>2</sub> O) <sub>4</sub> (Htrz)(trz) <sub>3</sub> ] <sub>2</sub> (PW <sub>9</sub> Nb <sub>3</sub> O <sub>40</sub> )·13H <sub>2</sub> O    | Bin Yue, Heyong He                    | <i>Dalton Trans.</i> , 2018, 47, 233.            | 2018 |
| K <sub>6</sub> H <sub>3</sub> [Nb <sub>2</sub> K(H <sub>2</sub> O) <sub>4</sub> (A-α-SiW <sub>9</sub> O <sub>34</sub> ) <sub>2</sub> ]·23H <sub>2</sub> O                                                           | Jingyang Niu                          | <i>Inorg Chem Commun.</i> , 2012, 17, 75.        | 2012 |

|                                                                                                                                                                                              |                                            |                                                      |      |
|----------------------------------------------------------------------------------------------------------------------------------------------------------------------------------------------|--------------------------------------------|------------------------------------------------------|------|
| $\text{Cs}_{10}\text{Na}_3[(\text{SiW}_9\text{Nb}_3\text{O}_{38})_3\text{MnO}_3(\text{H}_2\text{O})_3] \cdot 18\text{H}_2\text{O}$                                                           | Dongdi Zhang, Jingyang Niu                 | <i>Dalton Trans.</i> , 2016, 45, 15236.              | 2016 |
| $\text{Cs}_{12}[(\text{SiW}_9\text{Nb}_3\text{O}_{38})_3\text{WO}_3(\text{OH})_3] \cdot 33\text{H}_2\text{O}$                                                                                | Jingyang Niu, Dongdi Zhang                 | <i>RSC Adv.</i> , 2017, 7, 36416.                    | 2017 |
| <b>Wells-Dawson-type Mixed-PONb clusters</b>                                                                                                                                                 |                                            |                                                      |      |
| $\text{K}_6\text{Na}_4\text{H}_8[\text{Ln}_6(\text{H}_2\text{O})_{38}(\text{P}_2\text{W}_{15}\text{Nb}_3\text{O}_{62})_4] \cdot 45\text{H}_2\text{O}$ Ln=Eu, Ce                              | Shu-Xia Liu                                | <i>Eur. J. Inorg. Chem.</i> , 2012, 3229.            | 2012 |
| $[(n\text{-C}_4\text{H}_9)_4\text{N}]_9\text{P}_2\text{W}_{15}\text{Nb}_3\text{O}_{62}$                                                                                                      | Richard G. Finke                           | <i>Inorg. Chem.</i> , 2014, 53, 2666.                | 2014 |
| $\text{Na}_{12}[\text{H}_{24}\{\text{Nb}_4\text{O}_6(\text{OH})_4\}\{\text{Nb}_6\text{P}_2\text{W}_{12}\text{O}_{61}\}_4] \cdot 24\text{H}_2\text{O}$                                        | Jingping Wang, Jingyang Niu                | <i>Inorg. Chem.</i> , 2014, 53, 9917.                | 2014 |
| $\text{K}_7[\text{H}_{13}\{\text{Nb}_6(\text{O}_2)_4\text{P}_2\text{W}_{12}\text{O}_{57}\}_2] \cdot 31\text{H}_2\text{O}$                                                                    | Jingping Wang, Jingyang Niu                | <i>Inorg. Chem. Front.</i> , 2015, 2, 254.           | 2015 |
| $(\text{NH}_4)_{16}[\text{H}_{14}\{\text{P}_2\text{W}_{12}\text{Nb}_7\text{O}_{63}(\text{H}_2\text{O})_2\}_4\{\text{Nb}_4\text{O}_4(\text{OH})_6\}_4] \cdot 16\text{H}_2\text{O}$            | Jingping Wang, Jingyang Niu                | <i>Inorg. Chem. Front.</i> , 2015, 2, 254.           | 2015 |
| $\text{K}_{10}[\text{H}_{123}\text{Nb}_3\text{P}_{12}\text{W}_{72}\text{Mn}^{\text{III}}_{12}\text{Mn}^{\text{II}}_3\text{NaO}_{424}] \cdot 26\text{H}_2\text{O}$                            | Jingping Wang, Jingyang Niu                | <i>Chem. Eur. J.</i> , 2015, 21, 17683.              | 2015 |
| $(\text{TMA})_2\text{K}_5[\text{H}_5(\text{Nb}_6\text{P}_2\text{W}_{12})_2\text{Co}_3(\text{H}_2\text{O})_{11}\text{O}_{121}] \cdot 31\text{H}_2\text{O}$                                    | Tianbo Liu, Jingyang Niu                   | <i>Inorg. Chem.</i> , 2020, 59, 6747.                | 2020 |
| $\text{K}_4\text{Na}_4[\text{H}_6\text{P}_2\text{W}_{12}\text{Nb}_4\text{O}_{59}(\text{NbO}_2)_2] \cdot 48\text{H}_2\text{O}$                                                                | Bin Yue, Heyong He                         | <i>Inorg. Chem. Commun.</i> , 2014, 40, 108.         | 2014 |
| $[\text{Ag}_{25}\{\text{C}\equiv\text{CC}(\text{CH}_3)_3\}_{16}(\text{CH}_3\text{CN})_4(\text{P}_2\text{W}_{15}\text{Nb}_3\text{O}_{62})]$                                                   | Tomoji Ozeki                               | <i>Inorg. Chem.</i> , 2015, 54, 1650.                | 2015 |
| $\text{Cs}_5\text{K}_4\{\text{Cr}_3(\text{H}_2\text{O})_{12}[\text{P}_2\text{W}_{15}\text{Nb}_3\text{O}_{62}]_2\} \cdot 60\text{H}_2\text{O}$                                                | Chao Qin, Chao Lai, Zhong-Min Su           | <i>Dalton Trans.</i> , 2017, 46, 13345.              | 2017 |
| $\text{Cs}_{13}\text{K}_5\text{NaH}_3\{\text{Cr}_4(\text{H}_2\text{O})_{12}[\text{P}_2\text{W}_{15}\text{Nb}_3\text{O}_{62}]_4\} \cdot 13\text{H}_2\text{O}$                                 | Chao Qin, Chao Lai, Zhong-Min Su           | <i>Dalton Trans.</i> , 2017, 46, 13345.              | 2017 |
| $\text{Cs}_9[\text{P}_2\text{W}_{15}(\text{NbO}_2)_3\text{O}_{59}] \cdot 16\text{H}_2\text{O}$                                                                                               | Chao Qin, Chao Lai, Zhong-Min Su           | <i>Dalton Trans.</i> , 2017, 46, 13345.              | 2017 |
| $\text{H}_4\{\text{Er}_3[3\text{-PyB}(\text{OH})_3]_4(\text{H}_2\text{O})_{12}\text{P}_2\text{W}_{15}\text{Nb}_3\text{O}_{62}\} \cdot 19\text{H}_2\text{O}$                                  | Jie Zhang, Xuenian Chen                    | <i>Chem. Commun.</i> , 2019, 55, 2525.               | 2019 |
| $\text{H}_3\{[\text{Er}_2[3\text{-PyB}(\text{OH})_2(\text{H}_2\text{O})_{11}][\text{P}_2\text{W}_{15}\text{Nb}_3\text{O}_{62}]] \cdot 25\text{H}_2\text{O}$                                  | Jie Zhang, Xuenian Chen                    | <i>Chem. Commun.</i> , 2019, 55, 2525.               | 2019 |
| $\text{H}_3\{[\text{Eu}_2[3\text{-PyB}(\text{OH})_2(\text{H}_2\text{O})_{11}][\text{P}_2\text{W}_{15}\text{Nb}_3\text{O}_{62}]] \cdot 11\text{H}_2\text{O}$                                  | Jie Zhang, Xuenian Chen                    | <i>Chem. Commun.</i> , 2019, 55, 2525.               | 2019 |
| $\text{K}_8\text{H}[\text{P}_2\text{W}_{15}(\text{NbO}_2)_3\text{O}_{59}] \cdot 12\text{H}_2\text{O}$                                                                                        | Lunyu Qu                                   | <i>Polyhedron.</i> , 1996, 15, 2273.                 | 1996 |
| $\text{H}_{19}[\text{M}_4(\text{H}_2\text{O})_x(\text{P}_2\text{W}_{15}\text{Nb}_3\text{O}_{62})_3] \cdot m(\text{HCOOH}) \cdot n\text{H}_2\text{O}$ (M = Cu, Co, Mn, Zn)                    | Shujun Li, Xuenian Chen                    | <i>Dalton Trans.</i> , 2021, 50, 8690.               | 2021 |
| $\text{Na}_4\text{H}_2[(3\text{-PyB})_4(\text{P}_2\text{W}_{15}\text{Ta}_3\text{O}_{62})_4] \cdot 7\text{C}_5\text{H}_5\text{N} \cdot 45\text{H}_2\text{O}$                                  | Zhiping Zheng, Carsten Streb, Xuenian Chen | <i>Angew. Chem. Int. Ed.</i> , 2020, 59, 8537.       | 2020 |
| $\text{Na}_2\text{H}_{26}[(3\text{-PyB})_4(\text{P}_2\text{W}_{15}\text{Nb}_3\text{O}_{62})_4] \cdot 2\text{C}_5\text{H}_5\text{N} \cdot 37\text{H}_2\text{O}$                               |                                            |                                                      |      |
| $\text{Eu}_3\text{Na}_{20.5}\text{K}_{2.5}\text{H}_{54}[\text{K}_4(\text{P}_2\text{W}_{15}\text{Ta}_3\text{O}_{62})_{12}(5\text{-PymB})_3(5\text{-PymBOH})_{12}] \cdot 94\text{H}_2\text{O}$ | Zhiping Zheng, Carsten Streb, Xuenian Chen | <i>Angew. Chem. Int. Ed.</i> , 2020, 59, 8537.       | 2020 |
| $\text{Na}_{15}\text{H}_{71}[\text{K}_4(\text{P}_2\text{W}_{15}\text{Nb}_3\text{O}_{62})_{12}(5\text{-PymB})_3(5\text{-PymBOH})_{12}] \cdot 99\text{H}_2\text{O}$                            |                                            |                                                      |      |
| $\text{NaH}_{15}\{\text{P}_2\text{W}_{15}\text{Nb}_3\text{O}_{62}\}_2(4\text{PBA})_2((4\text{PBA})_2\text{O}) \cdot 53\text{H}_2\text{O}$                                                    | Shujun Li, Carsten Streb, Xuenian Chen     | <i>Angew. Chem. Int. Ed.</i> , 2021, 60, 16953.      | 2021 |
| $\text{H}_{27}[(4\text{PyB})_3\text{O}_2(\text{OH})_3][\text{Ln}_2(\text{H}_2\text{O})_{12}(\text{P}_2\text{Nb}_3\text{W}_{15}\text{O}_{62})_4(4\text{PyBOH})_4] \cdot x\text{H}_2\text{O}$  | Shujun Li, Carsten Streb, Xuenian Chen     | <i>Angew. Chem. Int. Ed.</i> , 2023, 62, e202314999. | 2023 |

|                                                                                                                                  |                                         |                                                       |      |
|----------------------------------------------------------------------------------------------------------------------------------|-----------------------------------------|-------------------------------------------------------|------|
| $K_2Na_2H_3[(Fe(H_2O)_4)_3(P_2W_{15}Nb_3O_{62})_2] \cdot 24H_2O$                                                                 | Shujun Li, Bing Yu, Xuenian Chen        | <i>Chinese Chem. Lett.</i> , 2022, 33, 4395.          | 2022 |
| $K_2Na_3H_4[(Cr(H_2O)_4)_3(P_2W_{15}Nb_3O_{62})_2] \cdot 32H_2O$                                                                 | Shujun Li, Bing Yu, Xuenian Chen        | <i>Chinese Chem. Lett.</i> , 2022, 33, 4395.          | 2022 |
| $K_4Na_8H_4\{[Nb_4O_6(H_2O)_4Na_4(H_2O)_8][LaP_2W_{12}Nb_6O_{61}(H_2O)_7]_4\} \cdot 60H_2O$                                      | Bin Yue, Heyong He                      | <i>Polyhedron</i> , 2021, 195, 114974.                | 2021 |
| $K_4Na_8H_4\{[Nb_4O_6(H_2O)_4Na_4(H_2O)_8][CeP_2W_{12}Nb_6O_{61}(H_2O)_7]_4\} \cdot 58H_2O$                                      | Bin Yue, Heyong He                      | <i>Polyhedron</i> , 2021, 195, 114974.                | 2021 |
| $K_4Na_8H_4\{[Nb_4O_6(H_2O)_4Na_4(H_2O)_8][PrP_2W_{12}Nb_6O_{61}(H_2O)_7]_4\} \cdot 78H_2O$                                      | Bin Yue, Heyong He                      | <i>Polyhedron</i> , 2021, 195, 114974.                | 2021 |
| $K_4Na_8H_4\{[Nb_4O_6(H_2O)_4Na_4(H_2O)_8][NdP_2W_{12}Nb_6O_{61}(H_2O)_7]_4\} \cdot 66H_2O$                                      | Bin Yue, Heyong He                      | <i>Polyhedron</i> , 2021, 195, 114974.                | 2021 |
| $H_{14}[(Co(H_2O)_3)_2(C_{10}H_8N_2)_4(P_4W_{30}Nb_6O_{123})] \cdot 4(C_{10}H_8N_2) \cdot 8H_2O$                                 | Shujun Li, Bing Yu                      | <i>ACS Appl. Mater. Interfaces</i> , 2022, 14, 19278. | 2022 |
| <b>Keggin-type Mixed-POTa clusters</b>                                                                                           |                                         |                                                       |      |
| $Cs_3K_{3.5}H_{0.5}[SiW_9(TaO_2)_3O_{37}] \cdot 9H_2O$                                                                           | Shuxia Liu                              | <i>J. Am. Chem. Soc.</i> , 2012, 134, 19716.          | 2012 |
| $Cs_{10.5}K_4H_{5.5}[Ta_4O_6(SiW_9Ta_3O_{40})_4] \cdot 30H_2O$                                                                   | Shuxia Liu                              | <i>J. Am. Chem. Soc.</i> , 2012, 134, 19716.          | 2012 |
| $CsNa_2H[Cu(bpy)(H_2O)_3]_3\{[Cu(bpy)_2][Cu(bpy)(H_2O)_2]_3[Ta_4O_6(SiW_9Ta_3O_{40})_4]\} \cdot 17H_2O$<br>(bpy=2,2'-bipyridine) | Zhi-Ming Zhang, En-Bo Wang              | <i>ChemPlusChem</i> , 2014, 79, 1153.                 | 2014 |
| $K_4Na_4H_4[Ta_4O_6(SiW_9Ta_3O_{40})_4][Cu(apy)(H_2O)_2]_4 \cdot 42H_2O$<br>(apy=3-aminopyridine)                                | Zhi-Ming Zhang, En-Bo Wang              | <i>ChemPlusChem</i> , 2014, 79, 1153.                 | 2014 |
| $Cs_3K_2[(Si_2W_{18}Ta_6O_{78})Cr(H_2O)_4] \cdot 8H_2O$                                                                          | Chao Qin, Zhong-Min Su                  | <i>CrystEngComm</i> , 2016, 18, 8722.                 | 2016 |
| $Cs_3K_4H_2[(Si_2W_{18}Ta_6O_{78})FeCl_2(H_2O)_2] \cdot 15H_2O$                                                                  | Chao Qin, Zhong-Min Su                  | <i>CrystEngComm</i> , 2016, 18, 8722.                 | 2016 |
| $Cs_{12.5}K_{4.5}H[Ta_{12}Si_4W_{37}O_{158}] \cdot 25H_2O$                                                                       | Chao Qin, Zhong-Min Su                  | <i>Dalton Trans.</i> , 2017, 46, 10177.               | 2017 |
| $Cs_{12}K_3H_7[MnTa_{18}Si_6W_{54}O_{231}] \cdot 61H_2O$                                                                         | Chao Qin, Peng Huang, Zhong-Min Su      | <i>Chem. Commun.</i> , 2020, 56, 2403.                | 2020 |
| <b>Wells-Dawson-type Mixed-POTa clusters</b>                                                                                     |                                         |                                                       |      |
| $K_5Na_4[P_2W_{15}O_{59}(TaO_2)_3] \cdot 17H_2O$                                                                                 | Shuxia Liu                              | <i>J. Am. Chem. Soc.</i> , 2012, 134, 19716.          | 2012 |
| $K_8Na_8H_4[P_8W_{60}Ta_{12}(H_2O)_4(OH)_8O_{236}] \cdot 42H_2O$                                                                 | Shuxia Liu                              | <i>J. Am. Chem. Soc.</i> , 2012, 134, 19716.          | 2012 |
| $Cs_{16}K_{16}Na_4[Ta_{18}P_{12}W_{90}(OH)_6(H_2O)_2O_{360}] \cdot 24H_2O$                                                       | Chao Qin, Zhong-Min Su                  | <i>Chem. Commun.</i> , 2016, 52, 13787.               | 2016 |
| $Cs_{26}K_2H_2[Yb_2Ta_{18}P_{12}W_{90}(OH)_6(H_2O)_{16}O_{360}] \cdot 52H_2O$                                                    | Chao Qin, Zhong-Min Su                  | <i>Chem. Commun.</i> , 2016, 52, 13787.               | 2016 |
| $H_{20}[P_8W_{60}Ta_{12}(H_2O)_4(OH)_8O_{236}] \cdot 125H_2O$                                                                    | Xuenian Chen, Fengji Ma, Jie Zhang      | <i>J. Solid State Chem.</i> , 2016, 243, 1.           | 2016 |
| $[Ln_3(H_2O)_{22}][P_2W_{15}Ta_3O_{62}] \cdot nH_2O$<br>(Ln = Y, La, Ce, Pr, Nd, Eu, Gd, Tb, Dy, Ho, Er, Tm, Yb, and Lu)         | Shuxia Liu, Zhiping Zheng, Xuenian Chen | <i>Inorg. Chem.</i> , 2018, 57, 6624.                 | 2018 |

|                                                                                                                                                                                                                                                                                                                               |                              |                                                       |      |
|-------------------------------------------------------------------------------------------------------------------------------------------------------------------------------------------------------------------------------------------------------------------------------------------------------------------------------|------------------------------|-------------------------------------------------------|------|
| $\text{Cs}_3\text{K}_4\{\text{Cr}_3[\text{Ta}_3\text{P}_2\text{W}_{15}\text{O}_{62}]_2(\text{H}_2\text{O})_{12}\} \cdot 15\text{H}_2\text{O}$                                                                                                                                                                                 | Chao Qin, Zhong-Min Su       | <i>J. Mater. Chem. A</i> , 2017, 5, 22970.            | 2017 |
| $\text{Cs}_{8.5}\text{K}_8\text{Na}_2\text{H}_5.5\{\text{Cr}_4[\text{Ta}_3\text{P}_2\text{W}_{15}\text{O}_{62}]_4(\text{H}_2\text{O})_{12}\} \cdot 53\text{H}_2\text{O}$                                                                                                                                                      | Chao Qin, Zhong-Min Su       | <i>J. Mater. Chem. A</i> , 2017, 5, 22970.            | 2017 |
| $(\text{NH}_4)_{41}\text{H}_7[\text{K}_3(\text{H}_2\text{O})_3(\text{P}_2\text{W}_{15}\text{Ta}_3\text{O}_{62})_6(\text{Mo}_2\text{O}_4\text{CH}_3\text{CO}_2)_3(\text{MoO}_3)_2] \cdot 85\text{H}_2\text{O}$                                                                                                                 | Jiangwei Zhang, Xuenian Chen | <i>ACS Appl. Mater. Interfaces</i> , 2019, 11, 43287. | 2019 |
| <b>hetero-peroxo-PONb clusters</b>                                                                                                                                                                                                                                                                                            |                              |                                                       |      |
| $\text{Cs}_{2.5}\text{Na}_2\{\text{As}_2\text{Nb}_4(\text{O}_2)_4\text{O}_{14}\text{H}_{1.5}\} \cdot 11\text{H}_2\text{O}$                                                                                                                                                                                                    | Jingping Wang, Jingyang Niu  | <i>Dalton Trans.</i> , 2014, 43, 9843.                | 2014 |
| $\text{TMA}_3[\text{HNb}_4\text{P}_2\text{O}_{14}(\text{O}_2)_4] \cdot 9\text{H}_2\text{O}$                                                                                                                                                                                                                                   | Jung-Ho Son                  | <i>Chem. Eur. J.</i> , 2015, 21, 6727.                | 2015 |
| $\text{TMA}_3[\text{H}_7\text{Nb}_6\text{P}_4\text{O}_{24}(\text{O}_2)_6] \cdot 7\text{H}_2\text{O}$                                                                                                                                                                                                                          | Jung-Ho Son                  | <i>Chem. Eur. J.</i> , 2015, 21, 6727.                | 2015 |
| $(\text{CN}_3\text{H}_6)_6\text{H}_4[\text{P}_4\text{Nb}_6(\text{O}_2)_6\text{O}_{24}] \cdot 4\text{H}_2\text{O}$                                                                                                                                                                                                             | Jingyang Niu, Jingping Wang  | <i>CrystEngComm</i> , 2017, 19, 2768.                 | 2017 |
| $(\text{CN}_3\text{H}_6)_4\text{H}_4[\{\text{Cd}(\text{H}_2\text{O})_4\}\{\text{P}_4\text{Nb}_6(\text{O}_2)_6\text{O}_{24}\}] \cdot 7\text{H}_2\text{O}$                                                                                                                                                                      | Jingyang Niu, Jingping Wang  | <i>CrystEngComm</i> , 2017, 19, 2768.                 | 2017 |
| $\text{Cs}_3\text{H}_3\{\text{[M}(\text{H}_2\text{O})_{4.5}\text{]}_2[\text{P}_4\text{Nb}_6(\text{O}_2)_6\text{O}_{24}]\} \cdot 5\text{H}_2\text{O}$ [M = Co, Ni, Zn]                                                                                                                                                         | Jingyang Niu, Jingping Wang  | <i>CrystEngComm</i> , 2017, 19, 2768.                 | 2017 |
| $\text{Cs}_3\text{H}_3[\{\text{Cd}(\text{H}_2\text{O})_4\}_2\{\text{P}_4\text{Nb}_6(\text{O}_2)_6\text{O}_{24}\}] \cdot 12\text{H}_2\text{O}$                                                                                                                                                                                 | Jingyang Niu, Jingping Wang  | <i>CrystEngComm</i> , 2017, 19, 2768.                 | 2017 |
| $[\text{Ln}^{\text{III}}(\text{H}_2\text{O})_6]_2[\text{H}_4(\text{NbO}_2)_6\text{P}_4\text{O}_{24}] \cdot n\text{H}_2\text{O}$ [Ln = Eu, Gd, Tb, Dy, Ho, Er, Tm, Yb]                                                                                                                                                         | Jingyang Niu, Dongdi Zhang   | <i>Sci. Rep.</i> , 2017, 7, 10653.                    | 2017 |
| $\text{Cs}_4\text{H}_4[\text{P}_2\text{Se}_2\text{Nb}_6(\text{O}_2)_6\text{O}_{22}] \cdot 10\text{H}_2\text{O}$                                                                                                                                                                                                               | Jingyang Niu, Jingping Wang  | <i>Dalton Trans.</i> , 2019, 48, 13135.               | 2019 |
| $\text{Cs}_2\text{K}_3\{\text{[Ln}(\text{H}_2\text{O})_6\text{]}\text{[H}_{2.5}\text{P}_2\text{Se}_2\text{Nb}_6(\text{O}_2)_6\text{O}_{22}\text{]}\}_2 \cdot n\text{H}_2\text{O}$ [Ln = Dy, Tm, Yb, Lu]                                                                                                                       |                              |                                                       |      |
| $\text{Cs}_2\{\text{[Ln}(\text{H}_2\text{O})_4\text{]}\text{[H}_4\text{P}_2\text{Se}_2\text{Nb}_6(\text{O}_2)_6\text{O}_{22}\text{]}\}_2 \cdot n\text{H}_2\text{O}$ [Ln = Ce, Pr, Sm, Eu, Gd]                                                                                                                                 | Jingyang Niu, Jingping Wang  | <i>Inorg. Chem.</i> , 2022, 61, 12181.                | 2022 |
| $\text{Cs}_5\text{K}_2\text{H}_m\{\text{[Ln}(\text{H}_2\text{O})_6\text{]}\text{[P}_2\text{Se}_2\text{Nb}_6(\text{O}_2)_6\text{O}_{22}\text{]}\}_2\{\text{[Ln}_x(\text{H}_2\text{O})_y\text{]}\}_2\text{[P}_2\text{Se}_2\text{Nb}_6(\text{O}_2)_6\text{O}_{22}\text{]}\} \cdot n\text{H}_2\text{O}$ [Ln = Ho, Er, Tm, Yb, Lu] |                              |                                                       |      |
| <b>hetero-peroxo-POTa clusters</b>                                                                                                                                                                                                                                                                                            |                              |                                                       |      |
| $\text{Cs}_3[\text{H}_9\text{P}_4\text{Ta}_6(\text{O}_2)_6\text{O}_{25}] \cdot 9\text{H}_2\text{O}$                                                                                                                                                                                                                           | Jingyang Niu, Jingping Wang  | <i>Inorg. Chem.</i> , 2017, 56, 5537.                 | 2017 |
| $(\text{CN}_3\text{H}_6)_6[\text{H}_4\text{P}_4\text{Ta}_6(\text{O}_2)_6\text{O}_{24}] \cdot 4\text{H}_2\text{O}$                                                                                                                                                                                                             | Jingyang Niu, Jingping Wang  | <i>Inorg. Chem.</i> , 2017, 56, 5537.                 | 2017 |
| $\text{Cs}_3\text{H}_3[\text{Ni}_2(\text{H}_2\text{O})_4\{\text{P}_4\text{Ta}_6(\text{O}_2)_6\text{O}_{24}\}] \cdot 7\text{H}_2\text{O}$                                                                                                                                                                                      | Jingping Wang, Jingyang Niu  | <i>Chinese Chem. Lett.</i> , 2022, 33, 4675.          | 2021 |
| $\text{Cs}_3\text{NaH}_4[\text{Zn}(\text{H}_2\text{O})_4\{\text{P}_4\text{Ta}_6(\text{O}_2)_6\text{O}_{24}\}] \cdot 13\text{H}_2\text{O}$                                                                                                                                                                                     |                              |                                                       |      |
| $\text{Cs}_3\text{NaH}_4[\text{Cd}(\text{H}_2\text{O})_4\{\text{P}_4\text{Ta}_6(\text{O}_2)_6\text{O}_{24}\}] \cdot 8\text{H}_2\text{O}$                                                                                                                                                                                      | Jingping Wang, Jingyang Niu  | <i>Chinese Chem. Lett.</i> , 2022, 33, 4675.          | 2021 |
| $\text{Cs}_3[\text{Ln}(\text{H}_2\text{O})_6\{\text{H}_4(\text{TaO}_2)_6\text{As}_4\text{O}_{24}\}] \cdot 7\text{H}_2\text{O}$ (Ln = Sm, Eu, Tb, Dy, Er, Tm, Yb, Lu)                                                                                                                                                          | Jingping Wang, Jingyang Niu  | <i>Inorg. Chem.</i> , 2019, 58, 13030.                | 2019 |
| $\text{Cs}_2\text{KH}[(\text{TaO}_2)_6\text{Se}_4(\text{OH})_4\text{O}_{17}] \cdot 10\text{H}_2\text{O}$                                                                                                                                                                                                                      | Dongdi Zhang, Jingyang Niu   | <i>Dalton Trans.</i> , 2020, 49, 4078.                | 2020 |
| $\text{CsK}[\text{Ln}(\text{H}_2\text{O})_6(\text{TaO}_2)_6\text{Se}_4(\text{OH})_3\text{O}_{18}] \cdot 11\text{H}_2\text{O}$ [Ln = Tb, Dy, Ho, Er, Tm, Yb]                                                                                                                                                                   | Dongdi Zhang, Jingyang Niu   | <i>Dalton Trans.</i> , 2020, 49, 4078.                | 2020 |
| $\text{CsK}[\text{Ln}(\text{H}_2\text{O})_6(\text{TaO}_2)_6\text{Se}_4(\text{OH})_3\text{O}_{18}] \cdot 11\text{H}_2\text{O}$ [Ln = Eu, Gd, Lu]                                                                                                                                                                               | Guoping Yang, Dongdi Zhang   | <i>Dalton Trans.</i> , 2022, 51, 9988.                | 2022 |

---

|                                                                                                                              |                     |                                 |      |
|------------------------------------------------------------------------------------------------------------------------------|---------------------|---------------------------------|------|
| $\text{Cs}_2\text{K}_{1.5}\text{Na}_{1.5}[\text{Se}_4(\text{TaO}_2)_6(\text{OH})_3\text{O}_{18}] \cdot 17\text{H}_2\text{O}$ | Ke Li, Dongdi Zhang | <i>Tungsten</i> , 2022, 4, 158. | 2022 |
| $\text{KNa}_2[\text{HSe}_2(\text{TaO}_2)_6(\text{OH})_4(\text{H}_2\text{O})_2\text{O}_{13}] \cdot 15\text{H}_2\text{O}$      | Ke Li, Dongdi Zhang | <i>Tungsten</i> , 2022, 4, 158. | 2022 |

---

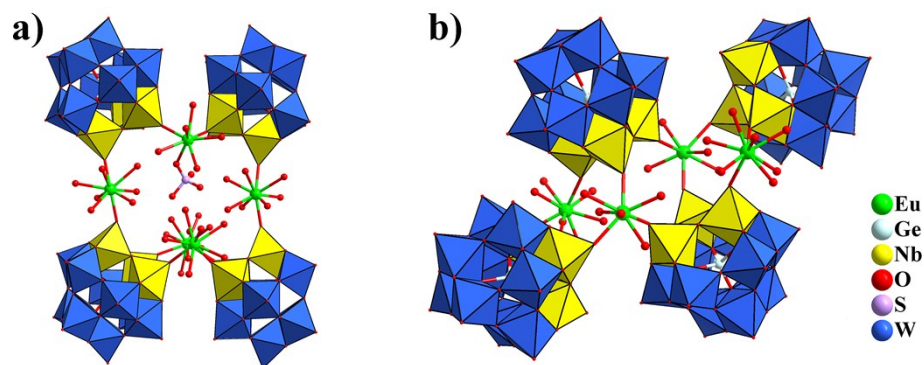

Fig. S1. Polyhedral representation of  $[\text{Cs}(\text{GeW}_9\text{Nb}_3\text{O}_{40})_4(\text{SO}_4)\text{Eu}_5(\text{H}_2\text{O})_{36}]^{14-}$  and  $[\text{Cs}_2(\text{GeW}_9\text{Nb}_3\text{O}_{40})_4\text{Eu}_4(\text{H}_2\text{O})_{22}]^{14-}$  polyanion.

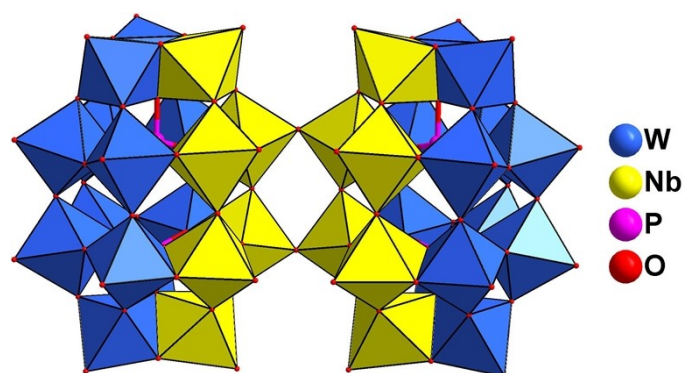

Fig. S2. Polyhedral representation of  $\{\text{P}_4\text{W}_{24}\text{Nb}_{12}\text{O}_{122}\}$  dimeric sub-units in  $[\text{H}_{24}\{\text{Nb}_4\text{O}_6(\text{OH})_4\}\{\text{Nb}_6\text{P}_2\text{W}_{12}\text{O}_{61}\}_4]^{12-}$  polyanion.

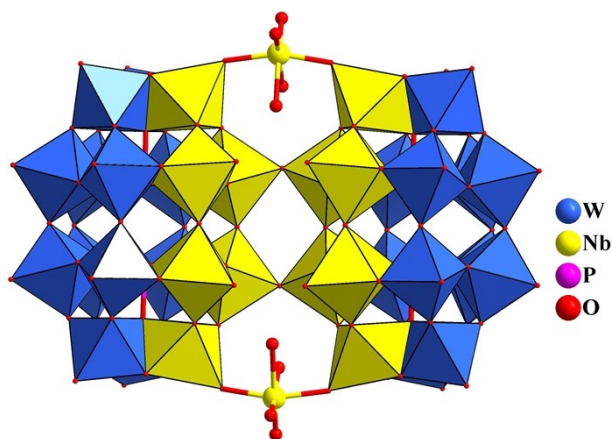

Fig. S3. Polyhedral representation of  $\{\text{P}_4\text{W}_{24}\text{Nb}_{14}\text{O}_{126}\}$  sub-unit in  $[\text{H}_{14}\{\text{P}_2\text{W}_{12}\text{Nb}_7\text{O}_{63}(\text{H}_2\text{O})_2\}_4\{\text{Nb}_4\text{O}_4(\text{OH})_6\}]^{16-}$  polyanion.

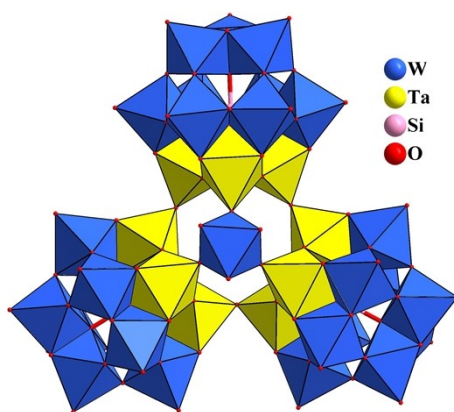

Fig. S4. Polyhedral representation of triangle  $\{\text{Si}_3\text{Ta}_9\text{W}_{28}\text{O}_{120}\}$  unit in  $[\text{Ta}_{12}\text{Si}_4\text{W}_{37}\text{O}_{158}]^{18-}$  polyanion.

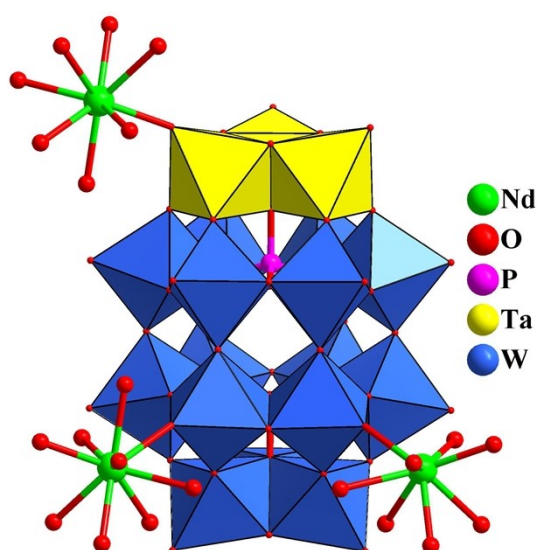

Fig. S5. The position of  $\text{Ln}^{\text{III}}$  cations in  $[\text{Ln}_3(\text{H}_2\text{O})_{22}][\text{P}_2\text{W}_{15}\text{Ta}_3\text{O}_{62}] \cdot n\text{H}_2\text{O}$ .

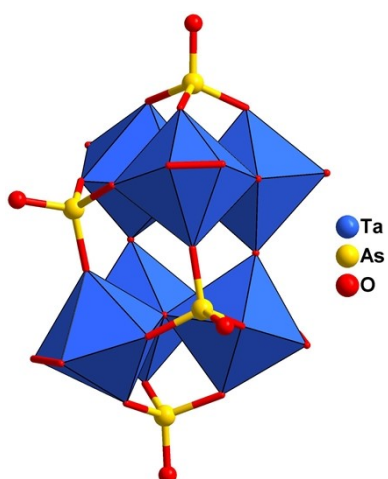

Fig. S6. Polyhedral representation of  $\{(\text{TaO}_2)_6\text{As}_4\text{O}_{24}\}$  subunit in  $\text{Cs}_3[\text{Ln}(\text{H}_2\text{O})_6\{\text{H}_4(\text{TaO}_2)_6\text{As}_4\text{O}_{24}\}] \cdot 7\text{H}_2\text{O}$ .
